# Supplementary material for: Mortality and recurrent vascular events after first incident stroke: a 9-year community-based study of 0·5 million Chinese adults
Source: PubMed Central journal article supplement (PMC7090905; doi:10.1016/s2214-109x(20)30069-3), 2020-03-18
Supplement: mmc1.pdf [file mmc1.pdf]

# THE LANCET

## Global Health

### Supplementary appendix

This appendix formed part of the original submission and has been peer reviewed. We post it as supplied by the authors.

Supplement to: Chen Y, Wright N, Guo Y, et al. Mortality and recurrent vascular events after first incident stroke: a 9-year community-based study of 0.5 million Chinese adults. *Lancet Glob Health* 2020; **8**: e580–90.

## **Supplementary Appendix**

Supplement to: Yiping Chen DPhil, Neil Wright PhD, Yu Guo MSc, Iain Turnbull MRCP, Christiana Kartsonaki DPhil, Ling Yang PhD, Zheng Bian MSc, Pei Pei MSc, Dongxia Pan MBBS, Yidan Zhang BSc, Haiqiang Qin MD, Yilong Wang MD, Jun Lv PhD, Ming Liu MD, Zilong Hao, Yongjun Wang MD, Canqing Yu PhD, Richard Peto FRS, Rory Collins FRS, Liming Li MPH, Robert Clarke FRCP, Zhengming Chen DPhil, for the China Kadoorie Biobank Collaborative Group. Mortality and recurrent vascular events after first incident stroke: a 9-year community-based study of 0.5 million Chinese adults

## Table of Contents:

|    |                                                                                                                                                                                                        |
|----|--------------------------------------------------------------------------------------------------------------------------------------------------------------------------------------------------------|
| 2  | Table of contents                                                                                                                                                                                      |
| 3  | Members of the China Kadoorie Biobank Collaborative Group                                                                                                                                              |
| 4  | webtable 1: Standardised event rates (95% CIs) per 100,000 person-years of different types of stroke after excluding 23,129 participants with prior IHD and/or stroke/TIA                              |
| 5  | webtable 2: Cumulative event rate of recurrent stroke, major vascular event, vascular mortality and all-cause mortality from 28 days after first IS                                                    |
| 6  | webtable 3: Cumulative event rate of recurrent stroke, major vascular event, vascular mortality and all-cause mortality from 28 days after first ICH                                                   |
| 7  | webtable 4: Cumulative event rate of recurrent stroke, major vascular event, vascular mortality and all-cause mortality following first stroke (combining before and after 28 days)                    |
| 8  | webtable 5: Cumulative event rate of recurrent stroke, major vascular event, vascular mortality and all-cause mortality following first IS (combining before and after 28 days)                        |
| 9  | webtable 6: Cumulative event rate of recurrent stroke, major vascular event, vascular mortality and all-cause mortality following first ICH (combining before and after 28 days)                       |
| 10 | webtable 7: Change of pathological type in the recurrent stroke up to 5 years following first stroke                                                                                                   |
| 10 | webtable 8: Change of pathological type in the recurrent stroke up to 5 years following first ischemic stroke subtypes                                                                                 |
| 11 | webtable 9: Cumulative event rate of recurrent stroke, major vascular events, vascular mortality and all-cause mortality from 28 days following first stroke among 21,817 adjudicated non-fatal events |
| 12 | webtable 10: Cumulative event rate of recurrent stroke following first stroke excluding recurrent stroke events with co-morbidity                                                                      |
| 13 | webfigure 1: Age-specific 28-day mortality rate following first stroke of different types by (a) sex and (b) area                                                                                      |
| 14 | webfigure 2: Estimated cumulative event rate of recurrent stroke from 28 days after first stroke of different types by (a) sex and (b) area                                                            |
| 15 | webfigure 3: Estimated cumulative all-cause mortality rate from 28 days after first stroke of different types by (a) sex and (b) area                                                                  |
| 16 | webfigure 4: Estimated cumulative event rate of MI and other cardiac diseases from 28 days after first stroke of different types                                                                       |

## **Members of the China Kadoorie Biobank Collaborative Group**

**International Steering Committee:** Junshi Chen, Zhengming Chen (PI), Robert Clarke, Rory Collins, Yu Guo, Liming Li (PI), Jun Lv, Richard Peto, and Robin Walters.

**International Co-ordinating Centre, Oxford:** Daniel Avery, Derrick Bennett, Ruth Boxall, Fiona Bragg, Yumei Chang, Yiping Chen, Zhengming Chen, Robert Clarke, Huaidong Du, Simon Gilbert, Alex Hacker, Michael Holmes, Christiana Kartsonaki, Rene Kerosi, Garry Lancaster, Kuang Lin, John McDonnell, Iona Millwood, Qunhua Nie, Paul Ryder, Sam Sansome, Dan Schmidt, Rajani Sohoni, Iain Turnbull, Robin Walters, Jenny Wang, Lin Wang, Neil Wright, Ling Yang, and Xiaoming Yang.

**National Co-ordinating Centre, Beijing:** Zheng Bian, Yu Guo, Xiao Han, Can Hou, Biao Jing, Chao Liu, Jun Lv, Pei Pei, and Canqing Yu.

**Regional Co-ordinating Centres:** Qingdao **Qingdao** CDC: Zengchang Pang, Ruqin Gao, Shanpeng Li, Shaojie Wang, Yongmei Liu, Ranran Du, Yajing Zang, Liang Cheng, Xiaocao Tian, Hua Zhang, Yaoming Zhai, Feng Ning, Xiaohui Sun, Feifei Li. Licang CDC: Silu Lv, Junzheng Wang, Wei Hou. **Heilongjiang** Provincial CDC: Mingyuan Zeng, Ge Jiang, Xue Zhou. Nangang CDC: Liqiu Yang, Hui He, Bo Yu, Yanjie Li, Qinai Xu, Quan Kang, Ziyang Guo. **Hainan** Provincial CDC: Dan Wang, Ximin Hu, Hongmei Wang, Jinyan Chen, Yan Fu, Zhenwang Fu, Xiaohuan Wang. Meilan CDC: Min Weng, Zhendong Guo, Shukuan Wu, Yilei Li, Huimei Li, Zhifang Fu. **Jiangsu** Provincial CDC: Ming Wu, Yonglin Zhou, Jinyi Zhou, Ran Tao, Jie Yang, Jian Su. Suzhou CDC: Fang Liu, Jun Zhang, Yihe Hu, Yan Lu, Liangcai Ma, Aiyu Tang, Shuo Zhang, Jianrong Jin, Jingchao Liu. **Guangxi** Provincial CDC: Zhenzhu Tang, Naying Chen, Ying Huang. Liuzhou CDC: Mingqiang Li, Jinhuai Meng, Rong Pan, Qilian Jiang, Jian Lan, Yun Liu, Liuping Wei, Liyuan Zhou, Ningyu Chen, Ping Wang, Fanwen Meng, Yulu Qin, Sisi Wang. **Sichuan** Provincial CDC: Xianping Wu, Ningmei Zhang, Xiaofang Chen, Weiwei Zhou. Pengzhou CDC: Guojin Luo, Jianguo Li, Xiaofang Chen, Xunfu Zhong, Jiaqiu Liu, Qiang Sun. **Gansu** Provincial CDC: Pengfei Ge, Xiaolan Ren, Caixia Dong. Maiji CDC: Hui Zhang, Enke Mao, Xiaoping Wang, Tao Wang, Xi Zhang. **Henan** Provincial CDC: Ding Zhang, Gang Zhou, Shixian Feng, Liang Chang, Lei Fan. Huixian CDC: Yulian Gao, Tianyou He, Huarong Sun, Pan He, Chen Hu, Xukui Zhang, Huifang Wu, Pan He. **Zhejiang** Provincial CDC: Min Yu, Ruying Hu, Hao Wang. Tongxiang CDC: Yijian Qian, Chunmei Wang, Kaixu Xie, Lingli Chen, Yidan Zhang, Dongxia Pan, Qijun Gu. **Hunan** Provincial CDC: Yuelong Huang, Biyun Chen, Li Yin, Huilin Liu, Zhongxi Fu, Qiaohua Xu. Liuyang CDC: Xin Xu, Hao Zhang, Huajun Long, Xianzhi Li, Libo Zhang, and Zhe Qiu.

Web Table 1: Standardised\* event rates (95% CIs) per 100,000 person-years of different types of stroke after excluding 23,129 participants with prior IHD and/or stroke/TIA

|                                      | Stroke type       |                        |                  |                |                          |                          |
|--------------------------------------|-------------------|------------------------|------------------|----------------|--------------------------|--------------------------|
|                                      | IS                |                        | ICH<br>(n=7,440) | SAH<br>(n=702) | Unspecified<br>(n=1,002) | Any stroke<br>(n=45,732) |
|                                      | LACI<br>(n=5,130) | Non-LACI<br>(n=31,458) |                  |                |                          |                          |
| <b>Age at risk (years)</b>           |                   |                        |                  |                |                          |                          |
| 40 – 49                              | 24 (21-27)        | 145 (139-151)          | 50 (46-53)       |                |                          | 232 (223-240)            |
| 50 – 59                              | 91 (86-96)        | 462 (452-473)          | 107 (102-112)    | 14 (12-16)     | 15 (14-17)               | 690 (677-703)            |
| 60 – 69                              | 159 (152-167)     | 985 (966-1004)         | 209 (200-217)    | 21 (19-24)     | 26 (23-29)               | 1401 (1378-1423)         |
| 70 – 79                              | 272 (258-286)     | 1959 (1921-1998)       | 482 (463-502)    |                | 63 (56-70)               | 2802 (2755-2848)         |
| <b>Sex</b>                           |                   |                        |                  |                |                          |                          |
| Men                                  | 103 (99-108)      | 729 (717-742)          | 193 (187-199)    |                |                          | 1062 (1047-1077)         |
| Women                                | 114 (110-118)     | 624 (615-634)          | 129 (125-133)    |                |                          | 903 (891-914)            |
| <b>Area</b>                          |                   |                        |                  |                |                          |                          |
| Rural                                | 42 (39-45)        | 630 (620-639)          | 211 (205-217)    | 17 (15-18)     | 20 (18-21)               | 919 (907-931)            |
| Urban                                | 197 (190-203)     | 713 (701-725)          | 87 (82-91)       |                |                          | 1031 (1017-1045)         |
| <b>Highest education</b>             |                   |                        |                  |                |                          |                          |
| No formal / primary school           |                   |                        |                  |                |                          |                          |
| Middle school or higher              |                   | 756 (739-774)          | 128 (121-136)    |                |                          | 1068 (1047-1089)         |
| <b>Annual household income (CNY)</b> |                   |                        |                  |                |                          |                          |
| <20,000                              | 116 (112-121)     | 722 (712-733)          | 178 (173-183)    |                |                          | 1055 (1042-1067)         |
| 20,000 – 34,9999                     |                   | 607 (592-623)          |                  |                |                          | 865 (847-884)            |
| ≥35,000                              |                   | 559 (541-577)          |                  |                |                          | 788 (767-809)            |
| <b>Current smoker</b>                |                   |                        |                  |                |                          |                          |
| Men                                  |                   |                        |                  |                |                          |                          |
| Current smoker                       |                   | 773 (766-780)          | 211 (207-214)    |                |                          | 1120 (1112-1129)         |
| Not current smoker                   |                   | 740 (732-748)          | 197 (193-202)    |                |                          | 1085 (1076-1095)         |
| Women                                |                   |                        |                  |                |                          |                          |
| Current smoker                       |                   |                        |                  |                |                          |                          |
| Not current smoker                   | 110 (108-113)     | 605 (599-611)          | 124 (121-126)    |                |                          | 873 (866-880)            |
| <b>Current alcohol drinker</b>       |                   |                        |                  |                |                          |                          |
| Men                                  |                   |                        |                  |                |                          |                          |
| Current drinker                      |                   | 759 (753-765)          | 188 (185-191)    |                |                          | 1096 (1089-1104)         |
| Not current drinker                  |                   | 764 (754-775)          |                  |                |                          | 1119 (1106-1131)         |
| Women                                |                   |                        |                  |                |                          |                          |
| Current drinker                      |                   | 681 (671-692)          | 110 (105-114)    |                |                          | 1001 (988-1014)          |
| Not current drinker                  | 83 (80-85)        | 568 (562-575)          | 130 (127-133)    |                |                          | 814 (806-822)            |
| <b>Prevalent disease</b>             |                   |                        |                  |                |                          |                          |
| Prevalent diabetes                   |                   |                        |                  |                |                          |                          |
| No prevalent diabetes                | 108 (105-111)     | 643 (636-651)          | 154 (150-158)    |                |                          | 941 (931-950)            |
| Prevalent hypertension               |                   | 1273 (1237-1309)       |                  |                |                          | 1850 (1805-1894)         |
| No prevalent hypertension            | 109 (106-113)     | 600 (592-608)          | 134 (131-138)    |                |                          | 876 (867-885)            |
| <b>All</b>                           | 110 (107-113)     | 668 (661-676)          | 156 (153-160)    | 15 (14-16)     | 21 (20-22)               | 970 (961-979)            |

4.46 million person-years follow up

\* Event rates standardised by age, sex and rural/urban as appropriate to the 40 to 79 year old CKB population excluding participants with prior IHD and/or stroke/TIA.

Where any strata contain less than 20 events, standardised rates are not presented.

**Web Table 2: Cumulative event rate of recurrent stroke, major vascular event, vascular mortality and all-cause mortality from 28 days after first IS**

|                                   | 28 days | Years since IS (n=36,588) |              |              |              |              |              |              |              |              |
|-----------------------------------|---------|---------------------------|--------------|--------------|--------------|--------------|--------------|--------------|--------------|--------------|
|                                   |         | 1                         | 2            | 3            | 4            | 5            | 6            | 7            | 8            | 9            |
| <b>Recurrent stroke</b>           |         |                           |              |              |              |              |              |              |              |              |
| No. events                        | 0       | 4,708                     | 6,965        | 8,345        | 9,185        | 9,766        | 10,137       | 10,368       | 10,505       | 10,569       |
| No. free of any events and deaths | 31,232  | 21,877                    | 16,155       | 11,897       | 8,515        | 5,887        | 3,994        | 2,390        | 1,260        | 522          |
| No. deaths                        | 0       | 541                       | 892          | 1,167        | 1,379        | 1,512        | 1,618        | 1,694        | 1,746        | 1,758        |
| No. censored                      | 0       | 4,106                     | 7,220        | 9,823        | 12,153       | 14,067       | 15,483       | 16,780       | 17,721       | 18,383       |
| Cumulative event rate, % (95% CI) | 0       | 16 (16 - 17)              | 25 (25 - 26) | 32 (31 - 32) | 37 (36 - 37) | 41 (41 - 42) | 45 (44 - 46) | 48 (47 - 49) | 51 (50 - 52) | 54 (53 - 55) |
| <b>Major vascular event *</b>     |         |                           |              |              |              |              |              |              |              |              |
| No. events                        | 0       | 4,995                     | 7,470        | 9,005        | 9,982        | 10,647       | 11,077       | 11,355       | 11,517       | 11,591       |
| No. free of any events and deaths | 31,189  | 21,807                    | 16,073       | 11,825       | 8,441        | 5,819        | 3,939        | 2,351        | 1,244        | 515          |
| No. deaths                        | 0       | 290                       | 456          | 586          | 678          | 741          | 791          | 825          | 848          | 852          |
| No. censored                      | 0       | 4,097                     | 7,190        | 9,773        | 12,088       | 13,982       | 15,382       | 16,658       | 17,580       | 18,231       |
| Cumulative event rate, % (95% CI) | 0       | 17 (17 - 18)              | 27 (27 - 28) | 34 (34 - 35) | 40 (40 - 41) | 45 (45 - 46) | 50 (49 - 50) | 54 (53 - 54) | 57 (56 - 58) | 60 (59 - 61) |
| <b>Vascular mortality</b>         |         |                           |              |              |              |              |              |              |              |              |
| No. events                        | 0       | 812                       | 1,416        | 1,921        | 2,342        | 2,699        | 2,978        | 3,152        | 3,292        | 3,359        |
| No. free of any events and deaths | 35,120  | 29,037                    | 23,936       | 19,173       | 14,653       | 10,688       | 7,683        | 5,001        | 2,761        | 1,119        |
| No. deaths                        | 0       | 357                       | 617          | 822          | 1,001        | 1,114        | 1,212        | 1,282        | 1,331        | 1,345        |
| No. censored                      | 0       | 4,914                     | 9,151        | 13,204       | 17,124       | 20,619       | 23,247       | 25,685       | 27,736       | 29,297       |
| Cumulative event rate, % (95% CI) | 0       | 2 (2 - 3)                 | 5 (4 - 5)    | 7 (6 - 7)    | 9 (9 - 9)    | 11 (11 - 12) | 14 (13 - 14) | 16 (15 - 17) | 19 (18 - 20) | 21 (20 - 22) |
| <b>All-cause mortality</b>        |         |                           |              |              |              |              |              |              |              |              |
| No. events                        | 0       | 1,169                     | 2,033        | 2,743        | 3,343        | 3,813        | 4,190        | 4,434        | 4,623        | 4,704        |
| No. free of any events and deaths | 35,120  | 29,037                    | 23,936       | 19,173       | 14,653       | 10,688       | 7,683        | 5,001        | 2,761        | 1,119        |
| No. censored                      | 0       | 4,914                     | 9,151        | 13,204       | 17,124       | 20,619       | 23,247       | 25,685       | 27,736       | 29,297       |
| Cumulative event rate, % (95% CI) | 0       | 4 (3 - 4)                 | 7 (6 - 7)    | 10 (9 - 10)  | 13 (12 - 13) | 16 (15 - 16) | 19 (19 - 20) | 22 (22 - 23) | 26 (25 - 27) | 29 (28 - 30) |

\* Stroke, MI and vascular mortality

**Web Table 3: Cumulative event rate of recurrent stroke, major vascular event, vascular mortality and all-cause mortality from 28 days after first ICH**

|                                   | 28 days | Years since ICH (n=7,440) |              |              |              |              |              |              |              |              |
|-----------------------------------|---------|---------------------------|--------------|--------------|--------------|--------------|--------------|--------------|--------------|--------------|
|                                   |         | 1                         | 2            | 3            | 4            | 5            | 6            | 7            | 8            | 9            |
| <b>Recurrent stroke</b>           |         |                           |              |              |              |              |              |              |              |              |
| No. events                        | 0       | 741                       | 957          | 1,091        | 1,166        | 1,231        | 1,275        | 1,308        | 1,332        | 1,335        |
| No. free of any events and deaths | 3,262   | 2,180                     | 1,693        | 1,301        | 1,024        | 806          | 579          | 378          | 196          | 86           |
| No. deaths                        | 0       | 89                        | 135          | 174          | 202          | 217          | 230          | 243          | 249          | 250          |
| No. censored                      | 0       | 252                       | 477          | 696          | 870          | 1,008        | 1,178        | 1,333        | 1,485        | 1,591        |
| Cumulative event rate, % (95% CI) | 0       | 23 (22 - 25)              | 31 (29 - 33) | 37 (35 - 38) | 40 (38 - 42) | 44 (42 - 46) | 47 (45 - 49) | 50 (47 - 52) | 53 (50 - 55) | 53 (51 - 56) |
| <b>Major vascular event *</b>     |         |                           |              |              |              |              |              |              |              |              |
| No. events                        | 0       | 787                       | 1,024        | 1,180        | 1,269        | 1,345        | 1,395        | 1,438        | 1,466        | 1,470        |
| No. free of any events and deaths | 3,258   | 2,175                     | 1,689        | 1,296        | 1,018        | 799          | 573          | 374          | 194          | 85           |
| No. deaths                        | 0       | 44                        | 69           | 87           | 102          | 107          | 115          | 118          | 120          | 120          |
| No. censored                      | 0       | 252                       | 476          | 695          | 869          | 1,007        | 1,175        | 1,328        | 1,478        | 1,583        |
| Cumulative event rate, % (95% CI) | 0       | 25 (23 - 26)              | 33 (32 - 35) | 40 (38 - 41) | 44 (42 - 46) | 48 (46 - 50) | 51 (49 - 54) | 55 (53 - 57) | 59 (56 - 61) | 60 (57 - 63) |
| <b>Vascular mortality</b>         |         |                           |              |              |              |              |              |              |              |              |
| No. events                        | 0       | 348                       | 487          | 590          | 672          | 732          | 782          | 820          | 852          | 859          |
| No. free of any events and deaths | 3,930   | 3,173                     | 2,643        | 2,161        | 1,726        | 1,387        | 1,036        | 712          | 383          | 159          |
| No. deaths                        | 0       | 54                        | 87           | 113          | 132          | 144          | 158          | 166          | 170          | 173          |
| No. censored                      | 0       | 355                       | 713          | 1,066        | 1,400        | 1,667        | 1,954        | 2,232        | 2,525        | 2,739        |
| Cumulative event rate, % (95% CI) | 0       | 9 (8 - 10)                | 13 (12 - 14) | 17 (16 - 18) | 20 (19 - 21) | 23 (21 - 24) | 26 (24 - 27) | 29 (27 - 31) | 32 (30 - 35) | 34 (32 - 36) |
| <b>All-cause mortality</b>        |         |                           |              |              |              |              |              |              |              |              |
| No. events                        | 0       | 402                       | 574          | 703          | 804          | 876          | 940          | 986          | 1,022        | 1,032        |
| No. free of any events and deaths | 3,930   | 3,173                     | 2,643        | 2,161        | 1,726        | 1,387        | 1,036        | 712          | 383          | 159          |
| No. censored                      | 0       | 355                       | 713          | 1,066        | 1,400        | 1,667        | 1,954        | 2,232        | 2,525        | 2,739        |
| Cumulative event rate, % (95% CI) | 0       | 11 (10 - 12)              | 16 (14 - 17) | 20 (19 - 21) | 24 (23 - 26) | 28 (26 - 29) | 31 (29 - 33) | 35 (33 - 37) | 39 (37 - 41) | 41 (39 - 44) |

\* Stroke, MI and vascular mortality

**Web Table 4: Cumulative event rate of recurrent stroke, major vascular event, vascular mortality and all-cause mortality following first stroke (combining before and after 28 days)**

|                                   | Years since first stroke (n=45,732) |              |              |              |              |              |              |              |              |              |
|-----------------------------------|-------------------------------------|--------------|--------------|--------------|--------------|--------------|--------------|--------------|--------------|--------------|
|                                   | 0                                   | 1            | 2            | 3            | 4            | 5            | 6            | 7            | 8            | 9            |
| <b>Recurrent stroke</b>           |                                     |              |              |              |              |              |              |              |              |              |
| No. events                        | 0                                   | 11,457       | 13,981       | 15,526       | 16,464       | 17,139       | 17,563       | 17,836       | 18,002       | 18,071       |
| No. free of any events and deaths | 45,732                              | 24,916       | 18,535       | 13,723       | 9,953        | 7,008        | 4,799        | 2,937        | 1,565        | 668          |
| No. deaths                        | 0                                   | 4,627        | 5,039        | 5,363        | 5,606        | 5,758        | 5,882        | 5,974        | 6,036        | 6,049        |
| No. censored                      | 0                                   | 4,732        | 8,177        | 11,120       | 13,709       | 15,827       | 17,488       | 18,985       | 20,129       | 20,944       |
| Cumulative event rate, % (95% CI) | 0                                   | 26 (26 - 26) | 33 (32 - 33) | 38 (37 - 38) | 42 (41 - 42) | 45 (45 - 46) | 48 (47 - 48) | 50 (50 - 51) | 53 (52 - 53) | 55 (54 - 55) |
| <b>Major vascular event *</b>     |                                     |              |              |              |              |              |              |              |              |              |
| No. events                        | 0                                   | 15,825       | 18,593       | 20,323       | 21,414       | 22,186       | 22,678       | 23,010       | 23,208       | 23,288       |
| No. free of any events and deaths | 45,732                              | 24,839       | 18,448       | 13,646       | 9,872        | 6,933        | 4,738        | 2,894        | 1,547        | 660          |
| No. deaths                        | 0                                   | 347          | 548          | 698          | 807          | 877          | 937          | 975          | 1,001        | 1,005        |
| No. censored                      | 0                                   | 4,721        | 8,143        | 11,065       | 13,639       | 15,736       | 17,379       | 18,853       | 19,976       | 20,779       |
| Cumulative event rate, % (95% CI) | 0                                   | 36 (35 - 36) | 43 (43 - 44) | 49 (48 - 49) | 53 (53 - 54) | 57 (57 - 58) | 60 (60 - 61) | 63 (63 - 64) | 66 (66 - 67) | 68 (68 - 69) |
| <b>Vascular mortality</b>         |                                     |              |              |              |              |              |              |              |              |              |
| No. events                        | 0                                   | 6,291        | 7,055        | 7,680        | 8,196        | 8,628        | 8,968        | 9,188        | 9,367        | 9,445        |
| No. free of any events and deaths | 45,732                              | 33,334       | 27,525       | 22,097       | 17,001       | 12,562       | 9,078        | 5,984        | 3,321        | 1,368        |
| No. deaths                        | 0                                   | 426          | 729          | 962          | 1,168        | 1,298        | 1,416        | 1,496        | 1,550        | 1,569        |
| No. censored                      | 0                                   | 5,681        | 10,423       | 14,993       | 19,367       | 23,244       | 26,270       | 29,064       | 31,494       | 33,350       |
| Cumulative event rate, % (95% CI) | 0                                   | 14 (14 - 14) | 16 (16 - 16) | 18 (18 - 18) | 20 (20 - 20) | 22 (22 - 23) | 25 (24 - 25) | 27 (26 - 27) | 29 (28 - 30) | 31 (31 - 32) |
| <b>All-cause mortality</b>        |                                     |              |              |              |              |              |              |              |              |              |
| No. events                        | 0                                   | 6,717        | 7,784        | 8,642        | 9,364        | 9,926        | 10,384       | 10,684       | 10,917       | 11,014       |
| No. free of any events and deaths | 45,732                              | 33,334       | 27,525       | 22,097       | 17,001       | 12,562       | 9,078        | 5,984        | 3,321        | 1,368        |
| No. censored                      | 0                                   | 5,681        | 10,423       | 14,993       | 19,367       | 23,244       | 26,270       | 29,064       | 31,494       | 33,350       |
| Cumulative event rate, % (95% CI) | 0                                   | 15 (15 - 15) | 18 (17 - 18) | 21 (20 - 21) | 24 (23 - 24) | 26 (26 - 27) | 29 (29 - 30) | 32 (32 - 33) | 36 (35 - 36) | 38 (37 - 39) |

\* Stroke, MI and vascular mortality



**Web Table 5: Cumulative event rate of recurrent stroke, major vascular event, vascular mortality and all-cause mortality following first IS (combining before and after 28 days)**

|                                   | Years since first IS (n=36,588) |              |              |              |              |              |              |              |              |              |
|-----------------------------------|---------------------------------|--------------|--------------|--------------|--------------|--------------|--------------|--------------|--------------|--------------|
|                                   | 0                               | 1            | 2            | 3            | 4            | 5            | 6            | 7            | 8            | 9            |
| <b>Recurrent stroke</b>           |                                 |              |              |              |              |              |              |              |              |              |
| No. events                        | 0                               | 8,908        | 11,165       | 12,545       | 13,385       | 13,966       | 14,337       | 14,568       | 14,705       | 14,769       |
| No. free of any events and deaths | 36,588                          | 21,877       | 16,155       | 11,897       | 8,515        | 5,887        | 3,994        | 2,390        | 1,260        | 522          |
| No. deaths                        | 0                               | 1,454        | 1,805        | 2,080        | 2,292        | 2,425        | 2,531        | 2,607        | 2,659        | 2,671        |
| No. censored                      | 0                               | 4,349        | 7,463        | 10,066       | 12,396       | 14,310       | 15,726       | 17,023       | 17,964       | 18,626       |
| Cumulative event rate, % (95% CI) | 0                               | 25 (25 - 26) | 33 (33 - 34) | 39 (38 - 39) | 43 (43 - 44) | 47 (46 - 48) | 50 (50 - 51) | 53 (52 - 54) | 56 (55 - 56) | 58 (57 - 59) |
| <b>Major vascular event *</b>     |                                 |              |              |              |              |              |              |              |              |              |
| No. events                        | 0                               | 10,151       | 12,626       | 14,161       | 15,138       | 15,803       | 16,233       | 16,511       | 16,673       | 16,747       |
| No. free of any events and deaths | 36,588                          | 21,807       | 16,073       | 11,825       | 8,441        | 5,819        | 3,939        | 2,351        | 1,244        | 515          |
| No. deaths                        | 0                               | 290          | 456          | 586          | 678          | 741          | 791          | 825          | 848          | 852          |
| No. censored                      | 0                               | 4,340        | 7,433        | 10,016       | 12,331       | 14,225       | 15,625       | 16,901       | 17,823       | 18,474       |
| Cumulative event rate, % (95% CI) | 0                               | 29 (28 - 29) | 37 (37 - 38) | 44 (43 - 44) | 49 (48 - 49) | 53 (52 - 54) | 57 (56 - 57) | 60 (59 - 61) | 63 (63 - 64) | 66 (65 - 67) |
| <b>Vascular mortality</b>         |                                 |              |              |              |              |              |              |              |              |              |
| No. events                        | 0                               | 2,025        | 2,629        | 3,134        | 3,555        | 3,912        | 4,191        | 4,365        | 4,505        | 4,572        |
| No. free of any events and deaths | 36,588                          | 29,037       | 23,936       | 19,173       | 14,653       | 10,688       | 7,683        | 5,001        | 2,761        | 1,119        |
| No. deaths                        | 0                               | 357          | 617          | 822          | 1,001        | 1,114        | 1,212        | 1,282        | 1,331        | 1,345        |
| No. censored                      | 0                               | 5,169        | 9,406        | 13,459       | 17,379       | 20,874       | 23,502       | 25,940       | 27,991       | 29,552       |
| Cumulative event rate, % (95% CI) | 0                               | 6 (5 - 6)    | 8 (8 - 8)    | 10 (10 - 10) | 12 (12 - 12) | 14 (14 - 15) | 17 (16 - 17) | 19 (18 - 19) | 22 (21 - 22) | 24 (23 - 25) |
| <b>All-cause mortality</b>        |                                 |              |              |              |              |              |              |              |              |              |
| No. events                        | 0                               | 2,382        | 3,246        | 3,956        | 4,556        | 5,026        | 5,403        | 5,647        | 5,836        | 5,917        |
| No. free of any events and deaths | 36,588                          | 29,037       | 23,936       | 19,173       | 14,653       | 10,688       | 7,683        | 5,001        | 2,761        | 1,119        |
| No. censored                      | 0                               | 5,169        | 9,406        | 13,459       | 17,379       | 20,874       | 23,502       | 25,940       | 27,991       | 29,552       |
| Cumulative event rate, % (95% CI) | 0                               | 7 (6 - 7)    | 10 (9 - 10)  | 13 (12 - 13) | 16 (15 - 16) | 19 (18 - 19) | 22 (21 - 23) | 25 (24 - 26) | 29 (28 - 29) | 32 (31 - 33) |

\* Stroke, MI and vascular mortality

**Web Table 6: Cumulative event rate of recurrent stroke, major vascular event, vascular mortality and all-cause mortality following first ICH (combining before and after 28 days)**

|                                   | Years since first ICH (n=7,440) |              |              |              |              |              |              |              |              |              |
|-----------------------------------|---------------------------------|--------------|--------------|--------------|--------------|--------------|--------------|--------------|--------------|--------------|
|                                   | 0                               | 1            | 2            | 3            | 4            | 5            | 6            | 7            | 8            | 9            |
| <b>Recurrent stroke</b>           |                                 |              |              |              |              |              |              |              |              |              |
| No. events                        | 0                               | 2,132        | 2,348        | 2,482        | 2,557        | 2,622        | 2,666        | 2,699        | 2,723        | 2,726        |
| No. free of any events and deaths | 7,440                           | 2,180        | 1,693        | 1,301        | 1,024        | 806          | 579          | 378          | 196          | 86           |
| No. deaths                        | 0                               | 2,859        | 2,905        | 2,944        | 2,972        | 2,987        | 3,000        | 3,013        | 3,019        | 3,020        |
| No. censored                      | 0                               | 269          | 494          | 713          | 887          | 1,025        | 1,195        | 1,350        | 1,502        | 1,608        |
| Cumulative event rate, % (95% CI) | 0                               | 29 (28 - 30) | 32 (31 - 33) | 35 (34 - 36) | 36 (35 - 38) | 38 (37 - 39) | 39 (38 - 40) | 41 (39 - 42) | 42 (41 - 43) | 42 (41 - 44) |
| <b>Major vascular event *</b>     |                                 |              |              |              |              |              |              |              |              |              |
| No. events                        | 0                               | 4,952        | 5,189        | 5,345        | 5,434        | 5,510        | 5,560        | 5,603        | 5,631        | 5,635        |
| No. free of any events and deaths | 7,440                           | 2,175        | 1,689        | 1,296        | 1,018        | 799          | 573          | 374          | 194          | 85           |
| No. deaths                        | 0                               | 44           | 69           | 87           | 102          | 107          | 115          | 118          | 120          | 120          |
| No. censored                      | 0                               | 269          | 493          | 712          | 886          | 1,024        | 1,192        | 1,345        | 1,495        | 1,600        |
| Cumulative event rate, % (95% CI) | 0                               | 67 (66 - 68) | 71 (70 - 72) | 73 (72 - 74) | 75 (74 - 76) | 77 (76 - 78) | 79 (78 - 80) | 80 (79 - 81) | 82 (81 - 83) | 82 (81 - 84) |
| <b>Vascular mortality</b>         |                                 |              |              |              |              |              |              |              |              |              |
| No. events                        | 0                               | 3,840        | 3,979        | 4,082        | 4,164        | 4,224        | 4,274        | 4,312        | 4,344        | 4,351        |
| No. free of any events and deaths | 7,440                           | 3,173        | 2,643        | 2,161        | 1,726        | 1,387        | 1,036        | 712          | 383          | 159          |
| No. deaths                        | 0                               | 54           | 87           | 113          | 132          | 144          | 158          | 166          | 170          | 173          |
| No. censored                      | 0                               | 373          | 731          | 1,084        | 1,418        | 1,685        | 1,972        | 2,250        | 2,543        | 2,757        |
| Cumulative event rate, % (95% CI) | 0                               | 52 (51 - 53) | 54 (53 - 55) | 56 (55 - 57) | 58 (56 - 59) | 59 (58 - 60) | 61 (59 - 62) | 62 (61 - 63) | 64 (63 - 65) | 65 (63 - 66) |
| <b>All-cause mortality</b>        |                                 |              |              |              |              |              |              |              |              |              |
| No. events                        | 0                               | 3,894        | 4,066        | 4,195        | 4,296        | 4,368        | 4,432        | 4,478        | 4,514        | 4,524        |
| No. free of any events and deaths | 7,440                           | 3,173        | 2,643        | 2,161        | 1,726        | 1,387        | 1,036        | 712          | 383          | 159          |
| No. censored                      | 0                               | 373          | 731          | 1,084        | 1,418        | 1,685        | 1,972        | 2,250        | 2,543        | 2,757        |
| Cumulative event rate, % (95% CI) | 0                               | 53 (51 - 54) | 55 (54 - 56) | 58 (56 - 59) | 60 (59 - 61) | 62 (60 - 63) | 64 (62 - 65) | 65 (64 - 67) | 68 (66 - 69) | 69 (67 - 70) |

\* Stroke, MI and vascular mortality

**Web Table 7: Change of pathological type in the recurrent stroke up to 5 years following first stroke**

|                          | Second stroke type (%) |     |     |             |
|--------------------------|------------------------|-----|-----|-------------|
|                          | IS                     | ICH | SAH | Unspecified |
| <b>All</b>               |                        |     |     |             |
| <b>First stroke type</b> |                        |     |     |             |
| IS                       | 91                     | 7   | 0   | 2           |
| ICH                      | 41                     | 56  | 1   | 3           |
| SAH                      | 43                     | 29  | 27  | 1           |
| Unspecified              | 69                     | 9   | 0   | 22          |
| All                      | 85                     | 12  | 1   | 3           |
| <b>Urban</b>             |                        |     |     |             |
| <b>First stroke type</b> |                        |     |     |             |
| IS                       | 94                     | 3   | 0.3 | 2           |
| ICH                      | 53                     | 43  | 1   | 3           |
| SAH                      | 54                     | 21  | 25  | 0           |
| Unspecified              | 73                     | 3   | 0   | 24          |
| All                      | 91                     | 6   | 0.5 | 3           |
| <b>Rural</b>             |                        |     |     |             |
| <b>First stroke type</b> |                        |     |     |             |
| IS                       | 86                     | 11  | 0.4 | 2           |
| ICH                      | 35                     | 62  | 0.3 | 3           |
| SAH                      | 36                     | 35  | 28  | 2           |
| Unspecified              | 66                     | 17  | 0   | 17          |
| All                      | 78                     | 19  | 0.6 | 2           |

Percentages are calculated from estimated cumulative incidences, treating stroke types and all-cause mortality as competing risks. E.g. In urban regions, up to five years after a first stroke that is IS, 94% of second strokes are also IS and 3% are ICH.

**Web Table 8: Change of pathological type in the recurrent stroke up to 5 years following first ischemic stroke subtypes**

|                                   | Second stroke type (%) |          |     |     |             |
|-----------------------------------|------------------------|----------|-----|-----|-------------|
|                                   | LACI                   | Non-LACI | ICH | SAH | Unspecified |
| <b>All</b>                        |                        |          |     |     |             |
| <b>First ischemic stroke type</b> |                        |          |     |     |             |
| LACI                              | 47                     | 48       | 3   | 0   | 1           |
| Non-LACI                          | 10                     | 80       | 7   | 0   | 2           |
| All                               | 16                     | 75       | 7   | 0   | 2           |
| <b>Urban</b>                      |                        |          |     |     |             |
| <b>First ischemic stroke type</b> |                        |          |     |     |             |
| LACI                              | 50                     | 47       | 2   | 0.4 | 1           |
| Non-LACI                          | 16                     | 78       | 4   | 0.3 | 3           |
| All                               | 24                     | 71       | 3   | 0.3 | 2           |
| <b>Rural</b>                      |                        |          |     |     |             |
| <b>First ischemic stroke type</b> |                        |          |     |     |             |
| LACI                              | 23                     | 64       | 13  | 0   | 0           |
| Non-LACI                          | 4                      | 82       | 11  | 0.4 | 2           |
| All                               | 5                      | 81       | 11  | 0.4 | 2           |

**Web Table 9: Cumulative event rate of recurrent stroke, major vascular events, vascular mortality and all-cause mortality from 28 days following first stroke among 21,817 adjudicated non-fatal events**

|                                   | Years since first stroke |              |              |              |              |              |              |              |              |              |
|-----------------------------------|--------------------------|--------------|--------------|--------------|--------------|--------------|--------------|--------------|--------------|--------------|
|                                   | 0                        | 1            | 2            | 3            | 4            | 5            | 6            | 7            | 8            | 9            |
| <b>Recurrent stroke</b>           |                          |              |              |              |              |              |              |              |              |              |
| No. events                        | 0                        | 2,954        | 4,716        | 5,922        | 6,675        | 7,184        | 7,514        | 7,716        | 7,829        | 7,868        |
| No. free of any events and deaths | 19,927                   | 16,475       | 14,354       | 10,394       | 7,038        | 4,563        | 2,916        | 1,702        | 828          | 334          |
| No. deaths                        | 0                        | 470          | 794          | 1,031        | 1,222        | 1,323        | 1,405        | 1,464        | 1,506        | 1,513        |
| No. censored                      | 0                        | 28           | 63           | 2,580        | 4,992        | 6,857        | 8,092        | 9,045        | 9,764        | 10,212       |
| Cumulative event rate, % (95% CI) | 0                        | 15 (14 - 15) | 24 (23 - 24) | 30 (30 - 31) | 36 (35 - 36) | 40 (40 - 41) | 45 (44 - 46) | 49 (48 - 50) | 52 (51 - 53) | 54 (53 - 56) |
| <b>Major vascular event *</b>     |                          |              |              |              |              |              |              |              |              |              |
| No. events                        | 0                        | 3,200        | 5,128        | 6,464        | 7,325        | 7,900        | 8,275        | 8,512        | 8,643        | 8,688        |
| No. free of any events and deaths | 19,814                   | 16,348       | 14,216       | 10,272       | 6,950        | 4,496        | 2,864        | 1,668        | 811          | 329          |
| No. deaths                        | 0                        | 238          | 408          | 524          | 613          | 664          | 704          | 727          | 747          | 750          |
| No. censored                      | 0                        | 28           | 62           | 2,554        | 4,926        | 6,754        | 7,971        | 8,907        | 9,613        | 10,047       |
| Cumulative event rate, % (95% CI) | 0                        | 16 (16 - 17) | 26 (25 - 27) | 33 (33 - 34) | 39 (39 - 40) | 45 (44 - 46) | 50 (49 - 51) | 54 (53 - 55) | 59 (57 - 60) | 61 (60 - 62) |
| <b>Vascular mortality</b>         |                          |              |              |              |              |              |              |              |              |              |
| No. events                        | 0                        | 688          | 1,218        | 1,666        | 2,032        | 2,282        | 2,455        | 2,588        | 2,693        | 2,737        |
| No. free of any events and deaths | 21,817                   | 20,803       | 19,984       | 15,683       | 11,333       | 7,824        | 5,411        | 3,421        | 1,822        | 715          |
| No. deaths                        | 0                        | 293          | 527          | 707          | 867          | 967          | 1,033        | 1,078        | 1,112        | 1,124        |
| No. censored                      | 0                        | 33           | 88           | 3,761        | 7,585        | 10,744       | 12,918       | 14,730       | 16,190       | 17,241       |
| Cumulative event rate, % (95% CI) | 0                        | 3 (3 - 3)    | 6 (5 - 6)    | 8 (7 - 8)    | 10 (10 - 11) | 12 (12 - 13) | 15 (14 - 15) | 17 (16 - 18) | 20 (19 - 21) | 22 (21 - 24) |
| <b>All-cause mortality</b>        |                          |              |              |              |              |              |              |              |              |              |
| No. events                        | 0                        | 981          | 1,745        | 2,373        | 2,899        | 3,249        | 3,488        | 3,666        | 3,805        | 3,861        |
| No. free of any events and deaths | 21,817                   | 20,803       | 19,984       | 15,683       | 11,333       | 7,824        | 5,411        | 3,421        | 1,822        | 715          |
| No. censored                      | 0                        | 33           | 88           | 3,761        | 7,585        | 10,744       | 12,918       | 14,730       | 16,190       | 17,241       |
| Cumulative event rate, % (95% CI) | 0                        | 4 (4 - 5)    | 8 (8 - 8)    | 11 (11 - 12) | 15 (14 - 15) | 18 (17 - 18) | 21 (20 - 21) | 24 (23 - 25) | 28 (27 - 29) | 31 (30 - 32) |

\* Stroke, MI and vascular mortality

**Web Table 10: Cumulative event rate of recurrent stroke following first stroke excluding recurrent stroke events with co-morbidity**

|                                   | Years since first stroke (n=45,732) |              |              |              |              |              |              |              |              |              |
|-----------------------------------|-------------------------------------|--------------|--------------|--------------|--------------|--------------|--------------|--------------|--------------|--------------|
|                                   | 0                                   | 1            | 2            | 3            | 4            | 5            | 6            | 7            | 8            | 9            |
| Recurrent stroke                  |                                     |              |              |              |              |              |              |              |              |              |
| No. events                        | 0                                   | 4,694        | 6,851        | 8,209        | 9,051        | 9,660        | 10,037       | 10,264       | 10,413       | 10,481       |
| No. free of any events and deaths | 35,993                              | 25,664       | 19,335       | 14,448       | 10,539       | 7,467        | 5,142        | 3,185        | 1,712        | 731          |
| No. deaths                        | 0                                   | 1,010        | 1,593        | 2,032        | 2,377        | 2,598        | 2,769        | 2,897        | 2,986        | 3,004        |
| No. censored                      | 0                                   | 4,625        | 8,214        | 11,304       | 14,026       | 16,268       | 18,045       | 19,647       | 20,882       | 21,777       |
| Cumulative event rate, % (95% CI) | 0                                   | 14 (13 - 14) | 21 (21 - 22) | 27 (26 - 27) | 31 (31 - 32) | 35 (35 - 36) | 38 (38 - 39) | 41 (40 - 42) | 44 (43 - 44) | 46 (45 - 47) |

Second stroke events that occur on the same day as any other event (ICD-10 code not starting with I60, I61, I63, I64) are ignored. Cumulative event rate is from 28 days after first stroke.

**Web Figure 1: Age-specific 28-day mortality rate following first stroke of different types by (a) sex and (b) area**

**(a) Sex**

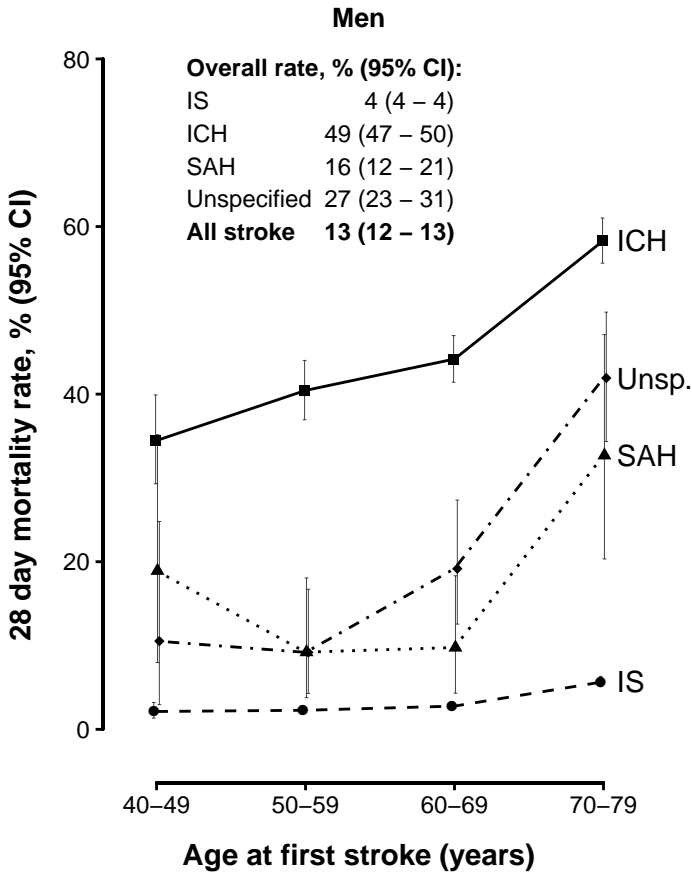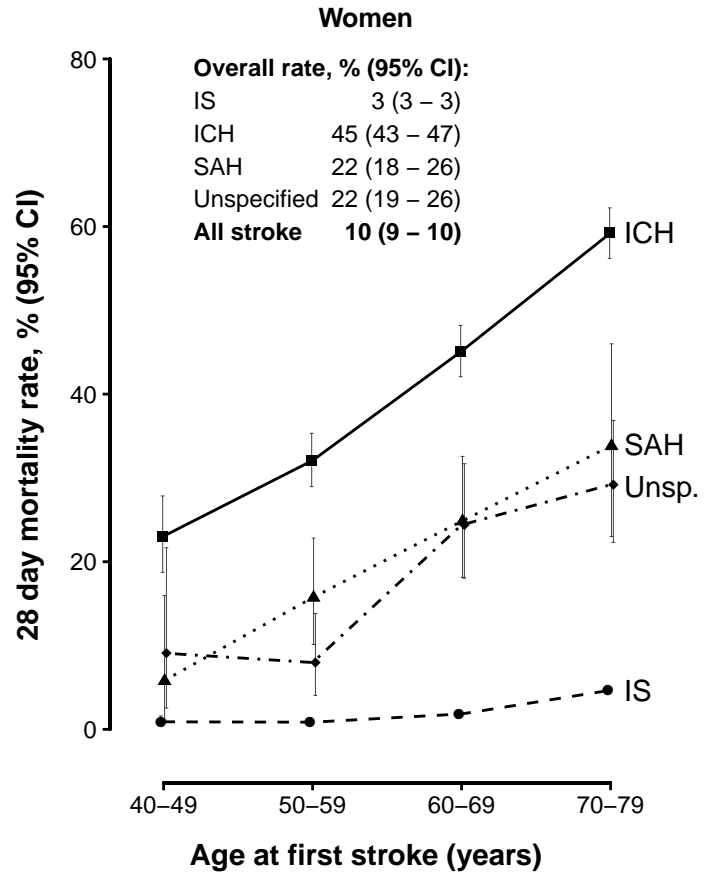

**(b) Area**

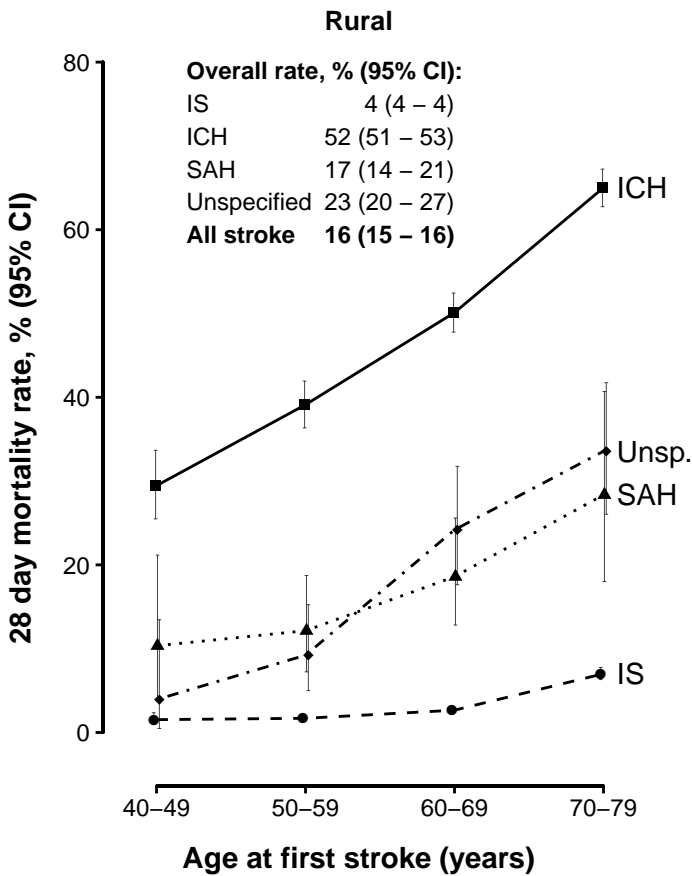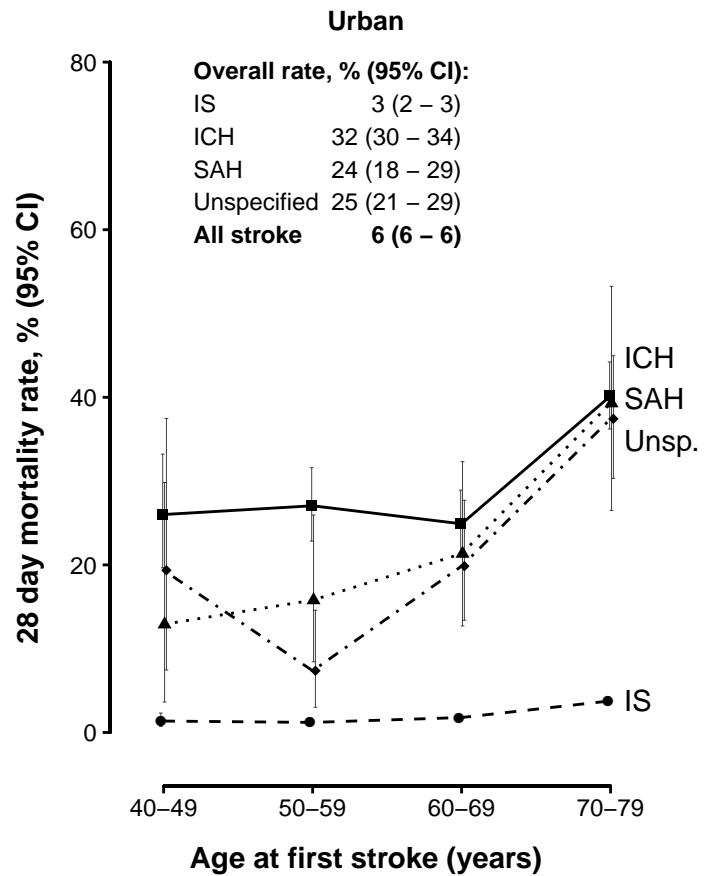

**Web Figure 2: Estimated cumulative event rate of recurrent stroke from 28 days after first stroke of different types by (a) sex and (b) area**

**(a) Sex**

**Men**

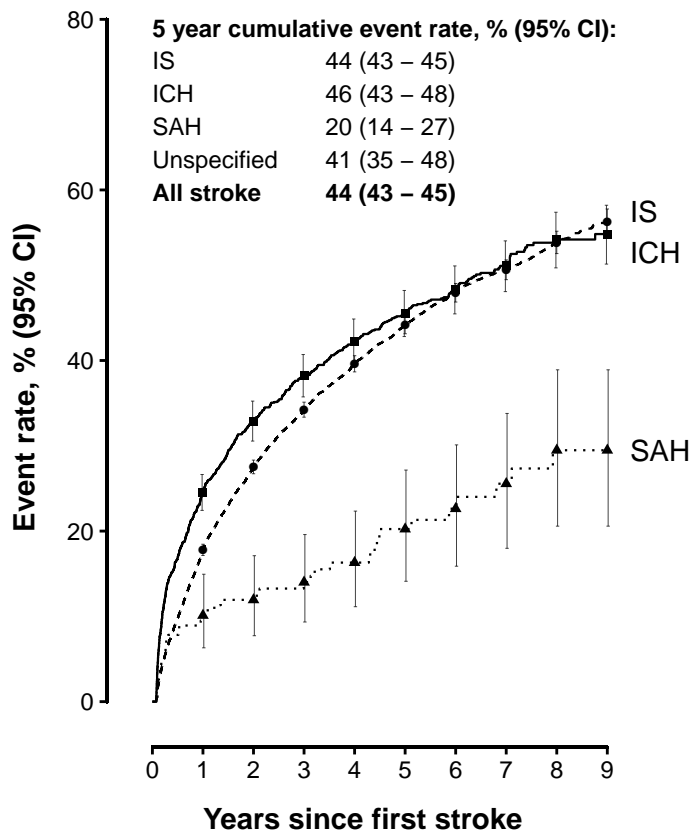

**Women**

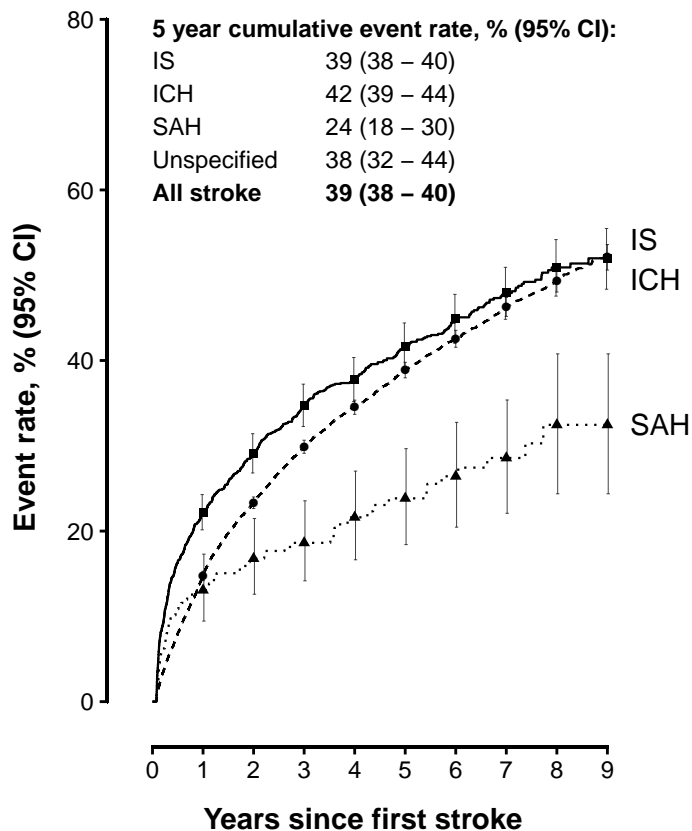

|          |        |       |     |     |
|----------|--------|-------|-----|-----|
| Numbers  | 13,770 | 2,538 | 211 | IS  |
| at risk: | 1,657  | 391   | 38  | ICH |
|          | 194    | 68    | 17  | SAH |

|          |        |       |     |     |
|----------|--------|-------|-----|-----|
| Numbers  | 17,462 | 3,349 | 311 | IS  |
| at risk: | 1,605  | 415   | 48  | ICH |
|          | 289    | 90    | 10  | SAH |

**(b) Area**

**Rural**

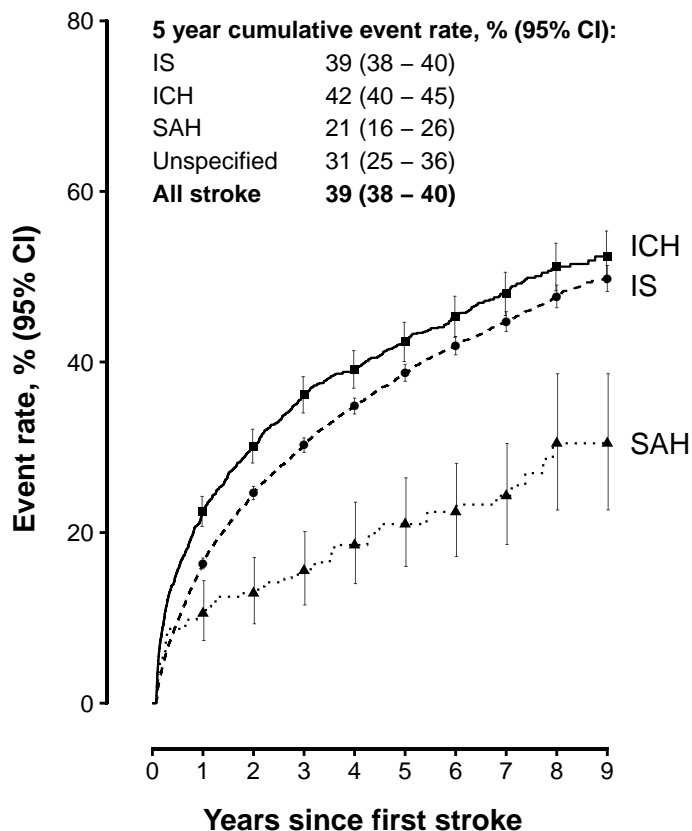

**Urban**

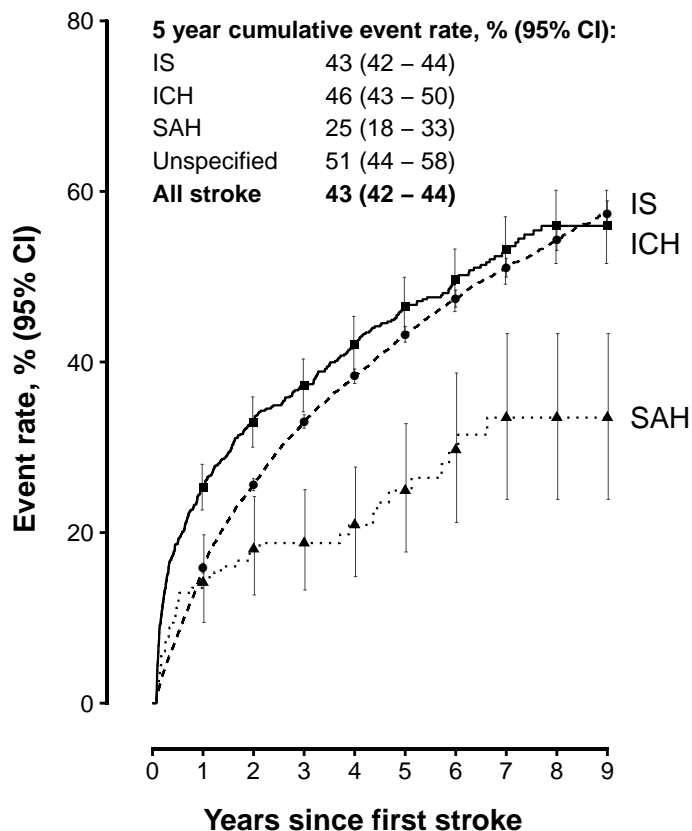

|          |        |       |     |     |
|----------|--------|-------|-----|-----|
| Numbers  | 14,313 | 2,729 | 272 | IS  |
| at risk: | 2,216  | 593   | 65  | ICH |
|          | 301    | 111   | 14  | SAH |

|          |        |       |     |     |
|----------|--------|-------|-----|-----|
| Numbers  | 16,919 | 3,158 | 250 | IS  |
| at risk: | 1,046  | 213   | 21  | ICH |
|          | 182    | 47    | 13  | SAH |

**Web Figure 3: Estimated cumulative all-cause mortality rate from 28 days after first stroke of different types by (a) sex and (b) area**

**(a) Sex**

**Men**

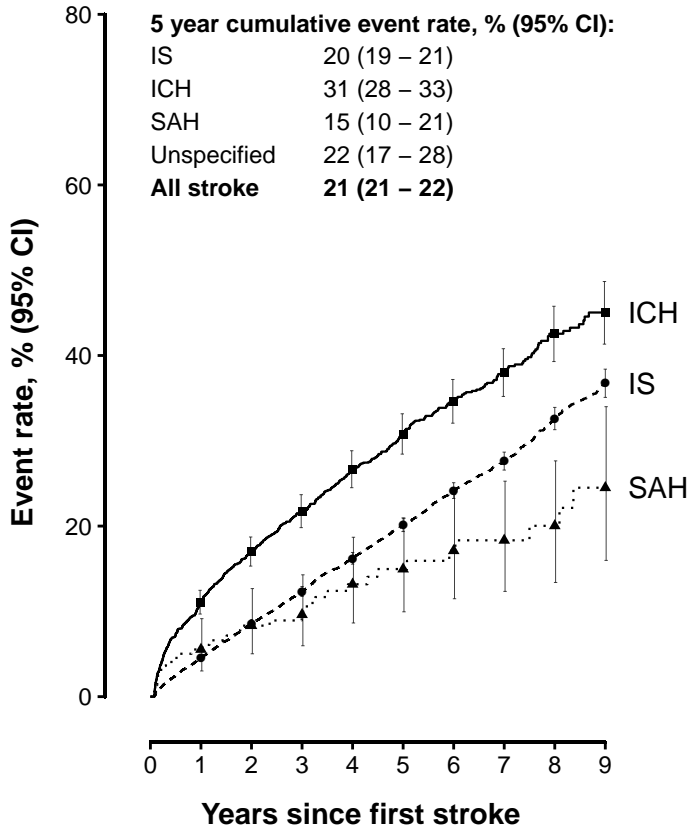

**Women**

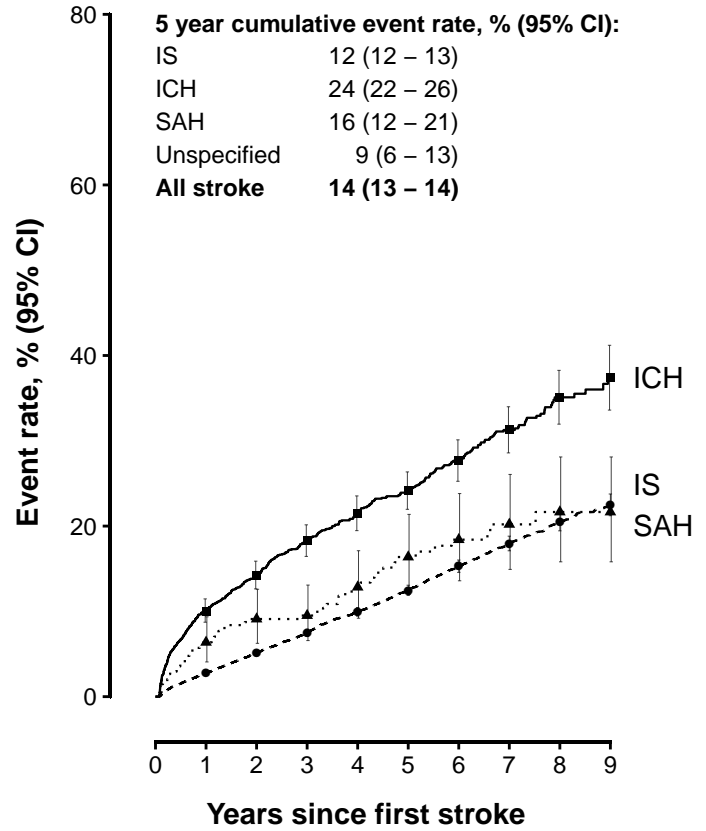

|                |       |     |     |
|----------------|-------|-----|-----|
| Numbers 15,612 | 4,833 | 511 | IS  |
| at risk: 2,007 | 681   | 78  | ICH |
| 223            | 88    | 22  | SAH |

|                |       |     |     |
|----------------|-------|-----|-----|
| Numbers 19,508 | 5,855 | 608 | IS  |
| at risk: 1,923 | 706   | 81  | ICH |
| 342            | 132   | 15  | SAH |

**(b) Area**

**Rural**

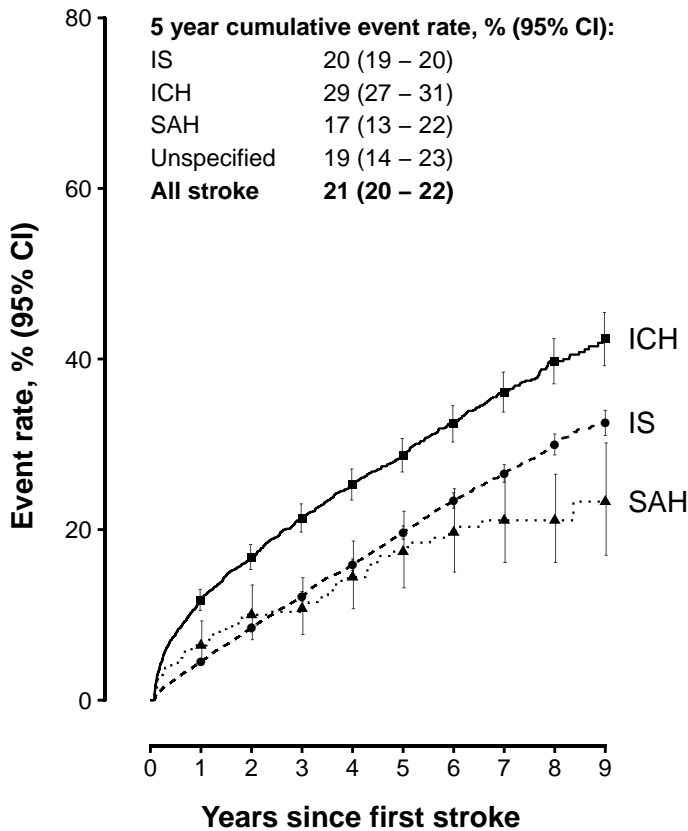

**Urban**

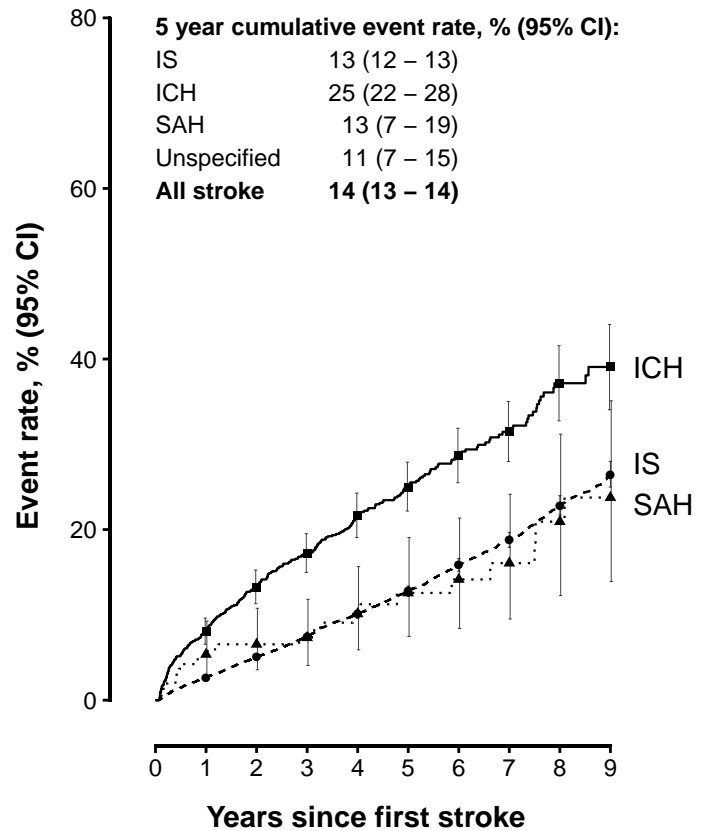

|                |       |     |     |
|----------------|-------|-----|-----|
| Numbers 16,787 | 4,804 | 524 | IS  |
| at risk: 2,691 | 971   | 119 | ICH |
| 370            | 157   | 18  | SAH |

|                |       |     |     |    |
|----------------|-------|-----|-----|----|
| Numbers 18,333 | 5,884 | 595 | IS  | 15 |
| at risk: 1,239 | 416   | 40  | ICH |    |
| 195            | 63    | 19  | SAH |    |
